# Supplementary material
Source: ML conference proceedings conference paper supplement (https://proceedings.neurips.cc/paper_files/paper/2009/hash/b1d10e7bafa4421218a51b1e1f1b0ba2-Abstract.html)
Supplement: Supplementary file [file b1d10e7bafa4421218a51b1e1f1b0ba2-Supplemental.zip]

---

# Proof of the Lemmas

---

**Liwei Wang**

Key Laboratory of Machine Perception, MOE,  
School of Electronics Engineering and Computer Science, Peking University,  
wanglw@cis.pku.edu.cn

Here we give the formal proofs of Lemma 8 and Lemma 9. Actually they are simple consequences of the following two theorem respectively.

**Theorem 1** *Let  $f$  be a function defined on  $[0, 1]^d$  and is  $K$ th order smooth. Let  $r = \int_{[0,1]^d} |f(x)|dx$ , then  $\|f\|_\infty = O(r^{\frac{K}{K+d}}) = O(r \cdot (\frac{1}{r})^{\frac{d}{K+d}})$ , where  $\|f\|_\infty = \sup_{x \in [0,1]^d} |f(x)|$ .*

**Theorem 2** *Let  $f$  be a function defined on  $[0, 1]^d$  and is infinitely smooth. If  $\int_{[0,1]^d} |f(x)|dx = r$ , then  $\|f\|_\infty = O(r \cdot \log^d(\frac{1}{r}))$ .*

**Proof of Lemma 8** By the assumption that  $|\tilde{\Phi}(x)| \leq \frac{1}{\alpha} |\Phi(x)|$  for all  $x \in [0, 1]^d$ , we have

$$\int_{[0,1]^d} |\tilde{\Phi}(x)|dx = O(r).$$

Since  $\tilde{\Phi}$  is  $K$ th order smooth, by Theorem 1 we have

$$\|\tilde{\Phi}\|_\infty = O\left(r \cdot \left(\frac{1}{r}\right)^{\frac{d}{K+d}}\right).$$

Therefore

$$\|\Phi\|_\infty \leq \beta \|\tilde{\Phi}\|_\infty = O\left(r \cdot \left(\frac{1}{r}\right)^{\frac{d}{K+d}}\right).$$

■

Lemma 9 can be proved in the same way by Theorem 2.

Below, we give the proofs of Theorem 1 and Theorem 2.

**Proof of Theorem 1** We first consider the one-dimensional case, i.e.  $d = 1$ . Note that if  $f \in F_C^K$ , then

$$|f^{(K-1)}(x) - f^{(K-1)}(x')| \leq C|x - x'| \quad (1)$$

for all  $x, x' \in [0, 1]$ . Hence we relax the constraint that  $f$  is  $K$ th order smooth to (1). The idea of the proof for  $d = 1$  is that, (one of) the optimal  $f$  (i.e.  $\|f\|_\infty$  achieves the maximum) under the constraint (1) is of the form

$$f(x) = \begin{cases} \frac{C}{K!}|x - \xi|^K & : 0 \leq x \leq \xi, \\ 0 & : \xi < x \leq 1. \end{cases} \quad (2)$$

That is

$$|f^{(K-1)}(x) - f^{(K-1)}(x')| = C|x - x'|$$

for all  $x, x' \in [0, \xi]$ , where  $\xi$  is determined by  $\int_0^1 f(x)dx = r$ . It is then easy to check that  $\|f\|_\infty = O(r^{\frac{K}{K+1}})$ .

For the formal proof, assume that  $f(x) \geq 0$  for all  $x \in [0, 1]$ . Let  $f_0$  be the optimal function, i.e.  $\|f_0\|_\infty \geq \|f\|_\infty$  for all  $f$  satisfying the constraints. We will show that

$$|f_0^{(K-1)}(x) - f_0^{(K-1)}(x')| = C|x - x'|$$

for all  $x, x'$  such that  $f(x) > 0$  and  $f(x') > 0$ . Assume, for the sake of contradiction, that this is not true. Then there exists an interval  $(a, b)$  and two constants  $C_1, C_2$ , such that

$$f_0(x) \geq C_1 > 0$$

and

$$|f_0^{(K-1)}(x) - f_0^{(K-1)}(x')| \leq C_2|x - x'| < C|x - x'|$$

for all  $x, x' \in (a, b)$ . Let

$$F(x) = \int_0^x f_0(t)dt.$$

We have

$$F(0) = 0, \quad F(1) = r, \quad F'(x) \geq 0$$

for all  $x \in [0, 1]$ . We also have

$$F'(x) \geq C_1 > 0, \quad |F^{(K)}(x) - F^{(K)}(x')| \leq C_2|x - x'| < C|x - x'|$$

for all  $x, x' \in (a, b)$ . Moreover,  $\|F'\|_\infty$  achieves the maximum.

Now, we will construct a function  $h(x)$ , so that there is a small  $\gamma$  so that  $F + \gamma h$  satisfies all the constraints but

$$\|F' + \gamma h'\|_\infty > \|F'\|_\infty,$$

which leads to a contradiction.

Denote  $x^* = \arg \max_{x \in [0, 1]} F'(x)$ . We will discuss three cases:

$$x^* \in (a, b), \quad x^* \in [b, 1], \quad x^* \in [0, a].$$

If  $x^* \in (a, b)$ , let

$$h(x) = (x - a)^{K+1}(b - x)^{K+1}.$$

It is easy to check that for  $|\gamma|$  sufficiently small,

$$(F + \gamma h)'(x) \geq 0, \quad x \in [0, 1],$$

and

$$|(F + \gamma h)^{(K)}(x) - (F + \gamma h)^{(K)}(x')| \leq C|x - x'|, \quad x, x' \in [0, 1]$$

If  $x^* \in (a, \frac{a+b}{2})$ , take  $\gamma > 0$ ; if  $x^* \in (\frac{a+b}{2}, b)$ , take  $\gamma < 0$ . It is clear that in both cases

$$(F' + \gamma h')(x^*) > F'(x^*).$$

If  $x^* = \frac{a+b}{2}$ , we can just use  $b' = a + \frac{3}{4}(b - a)$  instead of  $b$ .

If  $x^* \in [b, 1]$ , let

$$h(x) = \begin{cases} 0 & 0 \leq x \leq a, \\ \frac{(x-a)^{K+1}}{(x-a)^{K+1} + (b-x)^{K+1}} \cdot \frac{x-1}{1-b} & a < x < b, \\ \frac{x-1}{1-b} & b \leq x \leq 1. \end{cases}$$

It is not difficult to check that for sufficiently small  $\gamma > 0$ ,

$$(F + \gamma h)'(x) \geq 0,$$

and

$$|(F + \gamma h)^K(x) - (F + \gamma h)^K(x')| \leq C|x - x'|$$

for all  $x, x' \in [0, 1]$ , but

$$(F' + \gamma h')(x^*) > F'(x^*).$$

The case  $x^* \in [0, a]$  can be treated in the same way.

Now we have proved that the optimal  $f$  is, on the interval that  $f(x) > 0$ , a  $K$ th order polynomial with the coefficient of the term  $x^K$  is  $\frac{C}{K!}$ . If  $f(x) > 0$  only on  $[0, \xi)$  ( $\xi < 1$ ), then  $f$  must be of the form in Eq.(2). This is because  $f$  has continuous derivatives up to order  $K - 1$  at  $\xi$ , hence the derivatives up to  $K - 1$ th order must vanish at  $\xi$ . Thus we only need to exclude the possibility that  $f(x) > 0$  on  $[0, 1]$  except at a finite number of zeros. Below we will show that this is not possible because such a  $f$  must have  $\int_0^1 |f(x)|dx$  is greater than some constant, which contradicts to  $\int_0^1 |f(x)|dx = r$  where  $r$  can be arbitrarily small.

Let  $f$  be represented by the following standard form

$$f(x) = \frac{C}{K!} (x - r_1)^{p_1} \dots (x - r_t)^{p_t} [(x - r_{t+1})^{2p_{t+1}} + \alpha_1] \dots [(x - r_s)^{2p_s} + \alpha_{s-t}].$$

where  $\alpha_i \geq 0$  and the powers summing up to  $K$ . So the first  $t$  terms correspond to real zeros and the others correspond to complex zeros. In fact we only need to consider the case that all  $\alpha_i = 0$ , since it is easy to see that positive  $\alpha_i$  increase  $\int |f(x)|dx$ . Therefore we assume  $f$  has only real zeros. We first assume that there is no zero in  $[0, 1]$  and  $p$  is the total power of all negative zeros. Then

$$\begin{aligned} \int_0^1 |f(x)|dx &\geq \frac{C}{K!} \int_0^1 x^p (1-x)^{K-p} dx \\ &= \frac{C}{K!} \frac{\Gamma(p+1)\Gamma(K-p+1)}{\Gamma(K+2)} \\ &\geq \frac{C}{K!} \frac{\Gamma^2(\frac{K}{2}+1)}{\Gamma(K+2)}, \end{aligned}$$

where  $\Gamma(\cdot)$  is the gamma function.

For the case that there are zeros in  $[0, 1]$ . Assume without loss of generality that  $0 \leq r_1 < r_2 < \dots < r_l \leq 1$ . Denote  $\Delta_1 = r_1, \Delta_2 = r_2 - r_1, \dots, \Delta_{l+1} = 1 - r_l$ . We must have  $\max \Delta_i \geq \frac{1}{K+1}$ . Let  $i^*$  be the corresponding  $i$ , and consider  $r_{i^*-1}$  and  $r_{i^*}$ . Then we have

$$\begin{aligned} \int_0^1 |f(x)|dx &\geq \frac{C}{K!} \int_{r_{i^*-1}}^{r_{i^*}} (x - r_{i^*-1})^p (r_{i^*} - x)^{K-p} dx \\ &\geq \frac{C}{K!} \left(\frac{1}{K+1}\right)^{K+1} \frac{\Gamma^2(\frac{K}{2}+1)}{\Gamma(K+2)}. \end{aligned}$$

Thus in either case the integral can not be arbitrarily small.

To conclude the  $d = 1$  case, the optimal function  $f_0$  must satisfy

$$f_0^{(K-1)}(x) - f_0^{(K-1)}(x') = C|x - x'|$$

for all  $x, x'$  such that  $f(x) > 0$  and  $f(x') > 0$ . Since  $f$  must have continuous derivatives up to the  $(K - 1)$ th order, (one of) the optimal  $f$  has to be of the form given in Eq(2). This completes the proof of the one-dimensional case.

For the general case  $d \geq 1$ , the idea is to relax the constraints that the partial derivatives are Lipschitz to that the directional partial derivatives are Lipschitz.

First note that all  $K - 1$ th order partial derivatives are Lipschitz implies that all the  $K - 1$ th order directional derivatives are Lipschitz too. To be precise, let  $u$  be a unit vector, i.e.  $\|u\| = 1$ . Also let  $\phi_{x,u}(t) = f(x + tu)$ , where  $x$  is arbitrary. Then the  $p$ th order directional derivative is defined as  $\phi_{x,u}^{(p)}(t)$ . It is clear by calculus that if all  $D^k f$  are Lipschitz with some constant  $C$  for all  $k$  such that  $|k| = K - 1$ , then  $\phi_{x,u}^{(K-1)}(t)$  is Lipschitz with some other constant  $C'$  for all  $t, x$  and  $u$ . Now, let  $\mathbf{0}$  be the  $d$ -dimensional vector  $(0, \dots, 0)$  and  $x_0 \in [0, 1]^d$ . Let  $\phi_{x_0}(t) = f(\mathbf{0} + t \frac{x_0}{\|x_0\|})$ .

According to the arguments for the one dimensional case, it is not difficult to see that if  $\phi_{x_0}^{(K-1)}$  is Lipschitz for all  $t$  and  $x_0 \in [0, 1]^d$  with constant  $C'$ , then (one of) the optimal  $\phi$  must be of the form

$$\phi_{x_0}(t) = \begin{cases} \frac{C'}{K!} |t - \xi|^K & 0 \leq t \leq \xi, \\ 0 & \xi < t. \end{cases}$$

Hence the corresponding  $f$  has the form<sup>1</sup>

$$f(x) = \begin{cases} \frac{C'}{K!} \|x\| - \xi^K & 0 \leq \|x\| \leq \xi, \\ 0 & \xi < \|x\|. \end{cases}$$

where  $\xi$  is determined by  $\int_{[0,1]^d} |f(x)| dx = r$ . Finally, simple calculations show that  $\|f\|_\infty = O(r^{\frac{K}{K+d}})$ . This completes the proof. ■

**Proof of Theorem 2** First consider the  $d = 1$  case. Since  $f$  is infinitely smooth, it is  $K$ th order smooth for arbitrary large  $K$ . Hence we can choose  $K$  depending on  $r$ . Let

$$K + 1 = \frac{\log \frac{1}{r}}{\log \log \frac{1}{r}}.$$

We know that the optimal  $f$  is of the form in (2). We point out that this  $K$  is (approximately) the largest  $K$  such that (2) is still the optimal form. If  $K$  is larger than this,  $\xi$  will be out of  $[0, 1]$ , and the argument in the proof of Theorem 1 does not hold. Since  $\int_0^1 |f(x)| = r$ , we have

$$\xi^{K+1} = \frac{(K+1)!}{C}.$$

It is clear that

$$\|f\|_\infty = \frac{C}{K!} \xi^K.$$

Remember that

$$K + 1 = \frac{\log \frac{1}{r}}{\log \log \frac{1}{r}},$$

also note that

$$\left(\frac{1}{r}\right)^{\frac{\log \log \frac{1}{r}}{\log \log \frac{1}{r}}} = \log \frac{1}{r},$$

then by Stirling's formula, it is easy to show that  $\|f\|_\infty = O(r \cdot \log \frac{1}{r})$ .

For the general  $d \geq 1$  case, take

$$K + d = \frac{\log \frac{1}{r}}{\log \log \frac{1}{r}}.$$

By similar arguments in the proof Theorem 1 we have  $\|f\|_\infty = O(r \cdot \log^d \frac{1}{r})$ . ■

---

<sup>1</sup> $f$  is optimal under the relaxed constraints of directional partial derivatives. Actually this  $f$  no longer satisfies the original partial derivative constraints.
